# Supplementary material for: Luminescence properties of Eu2O3-doped ZrO2–Y2O3 single crystals
Source: Royal Society of Chemistry journal article supplement (doi:10.1039/d2ce01054b), 2022-01-01
Supplement: d2ce01054b1.pdf [file d2ce01054b1.pdf]

## Supporting Information

### **Luminescence properties of $\text{Eu}_2\text{O}_3$ - doped $\text{ZrO}_2$ - $\text{Y}_2\text{O}_3$ single crystals**

Shengdi Ta, Huiting Zhang, Wenxia Wu, Yazhao Wang, Peng Zhang, Zeyu Cheng, Shoulei Xu,

Bernard A. Goodman, Wen Deng\*

*School of Physical Science and Technology, Guangxi University, 100 East Daxue Road, Nanning  
530004, Guangxi, Peoples Republic of China*

*Corresponding author: Professor Wen Deng*

*Tel.: 0086-771-3232666;*

*Fax: 0086-771-3237386;*

*E-mail: [wdeng@gxu.edu.cn](mailto:wdeng@gxu.edu.cn)*

## Composition of the crystals

The compositions of the crystals are assumed to be the same as those of the mixtures from which they were synthesized, as shown in Table S1.

Table S1. Chemical compositions of Eu-doped single crystals

| Sample number | Composition (mol%) |                               |                                |
|---------------|--------------------|-------------------------------|--------------------------------|
|               | ZrO <sub>2</sub>   | Y <sub>2</sub> O <sub>3</sub> | Eu <sub>2</sub> O <sub>3</sub> |
| 1             | 92.00              | 7.90                          | 0.10                           |
| 2             | 92.00              | 7.70                          | 0.30                           |
| 3             | 92.00              | 7.50                          | 0.50                           |
| 4             | 92.00              | 7.25                          | 0.75                           |
| 5             | 92.00              | 7.00                          | 1.00                           |
| 6             | 92.00              | 6.00                          | 2.00                           |
| 7             | 92.00              | 5.00                          | 3.00                           |

## XRD Measurements

Table S2 Crystallite sizes of ground  $(\text{ZrO}_2)_{92}(\text{Y}_2\text{O}_3)_{8-z}(\text{Eu}_2\text{O}_3)_z$  crystals

| Sample number | z    | crystallite sizes (nm) |
|---------------|------|------------------------|
| 1             | 0.10 | 25.1319                |
| 2             | 0.30 | 28.3565                |
| 3             | 0.50 | 29.6404                |
| 4             | 0.75 | 30.4248                |
| 5             | 1.00 | 30.5094                |
| 6             | 2.00 | 30.8030                |
| 7             | 3.00 | 31.1846                |

## SEM images at different magnification

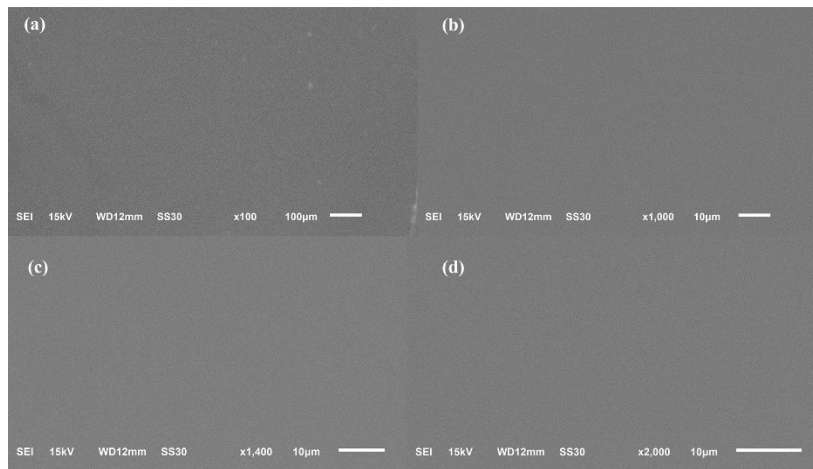

**Fig. S1.** SEM images of  $(\text{ZrO}_2)_{92}(\text{Y}_2\text{O}_3)_{6.00}(\text{Eu}_2\text{O}_3)_{2.00}$  crystal at magnification of (a)  $\times 100$ , (b)  $\times 1000$ , (c)  $\times 1400$ , and (d)  $\times 2000$ .

These images confirm that there are no cracks, or other defects associated with the crystal surface.

Transmission spectra for selected crystal discs prepared with composition  $(\text{ZrO}_2)_{92}(\text{Y}_2\text{O}_3)_{8-z}(\text{Eu}_2\text{O}_3)_z$

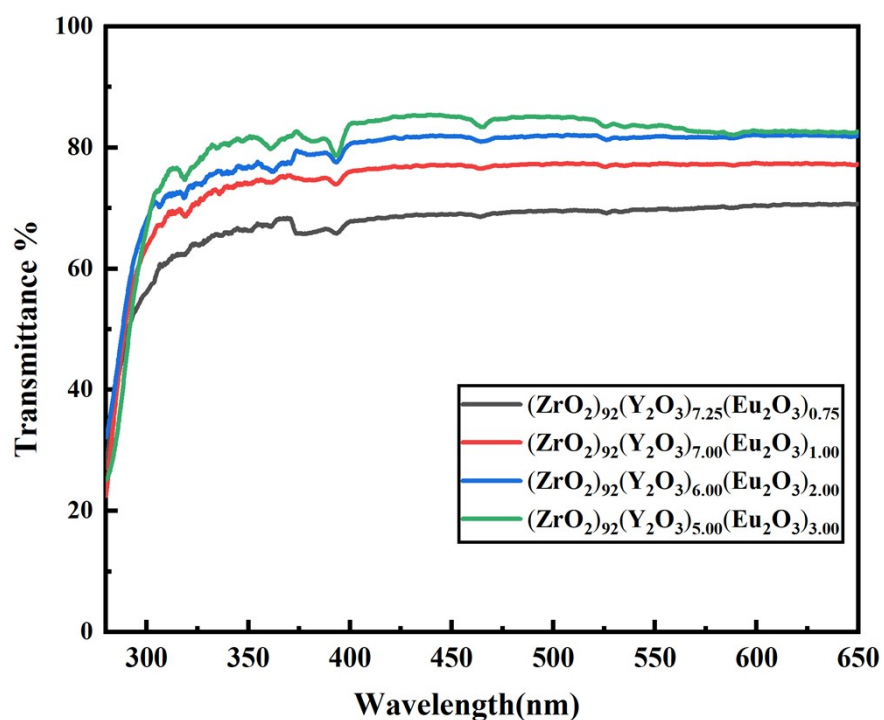

**Fig. S2.** Transmission spectra of  $(\text{ZrO}_2)_{92}(\text{Y}_2\text{O}_3)_{8-z}(\text{Eu}_2\text{O}_3)_z$  crystals with values for  $z$  of 0.75, 1.00, 2.00, and 3.00.

The transmittance in the range 325 – 600 nm increases as  $\text{Y}^{3+}$  is replaced by  $\text{Eu}^{3+}$ , with the average value being  $\sim 75\%$  for samples with  $z$  in the range 0.75 – 3.00.

## Mapping elemental contents by EDX spectroscopy

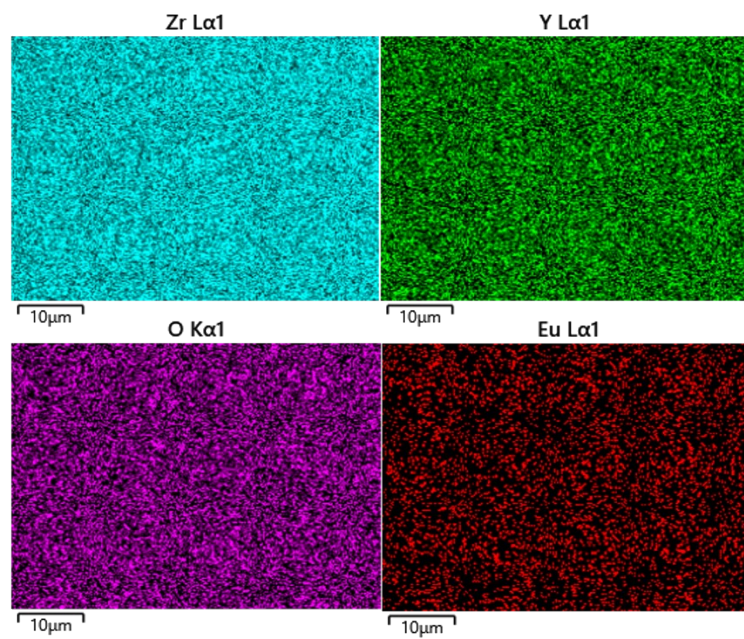

**Fig. S3.** Element distribution on the surface of a  $(\text{ZrO}_2)_{92}(\text{Y}_2\text{O}_3)_{6.00}(\text{Eu}_2\text{O}_3)_{2.00}$  crystal

These results show a completely random distribution of the elements at the sub-micrometre resolution.

Fluorescence decay measurements for  $(\text{ZrO}_2)_{92}(\text{Y}_2\text{O}_3)_{8-z}(\text{Eu}_2\text{O}_3)_z$  crystals

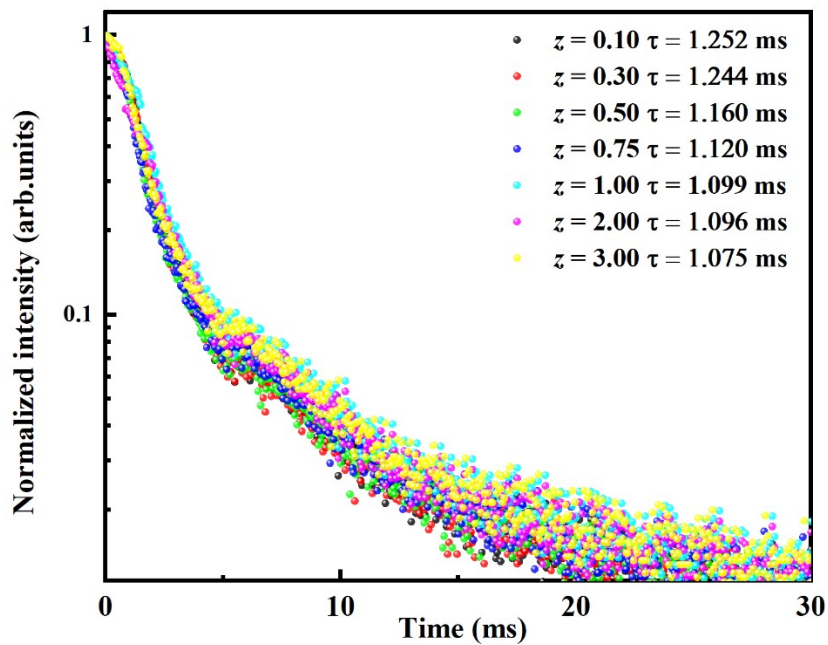

*Fig.S4* Fluorescence decay curve for  $(\text{ZrO}_2)_{92}(\text{Y}_2\text{O}_3)_{8-z}(\text{Eu}_2\text{O}_3)_z$  crystals

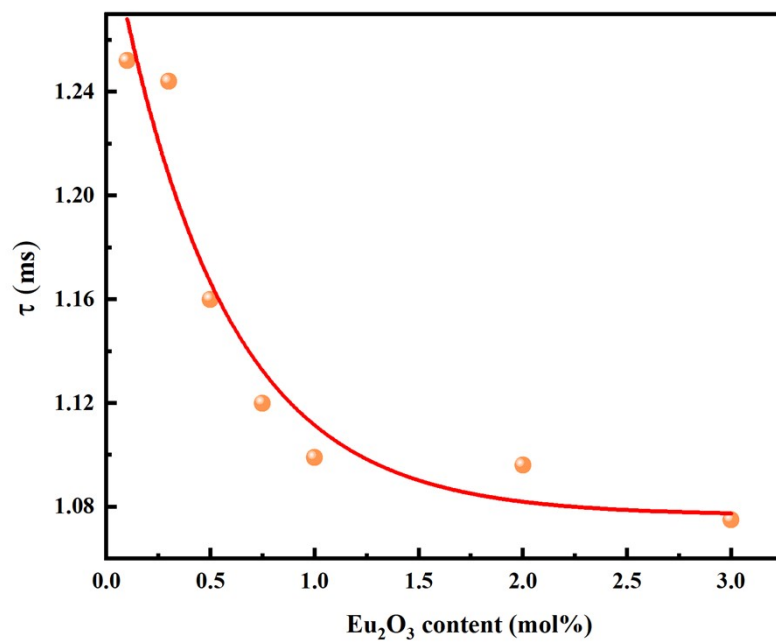

**Fig. S5** Variation of the fluorescence lifetime,  $\tau$ , with  $\text{Eu}_2\text{O}_3$  content,  $z$ , of  $(\text{ZrO}_2)_{92}(\text{Y}_2\text{O}_3)_{8-z}(\text{Eu}_2\text{O}_3)_z$  crystals
